# Supplementary material
Source: PubMed Central journal article supplement (PMC3927461)
Supplement: halms815234-supplement_1.pdf [file halms815234-supplement_1.pdf]

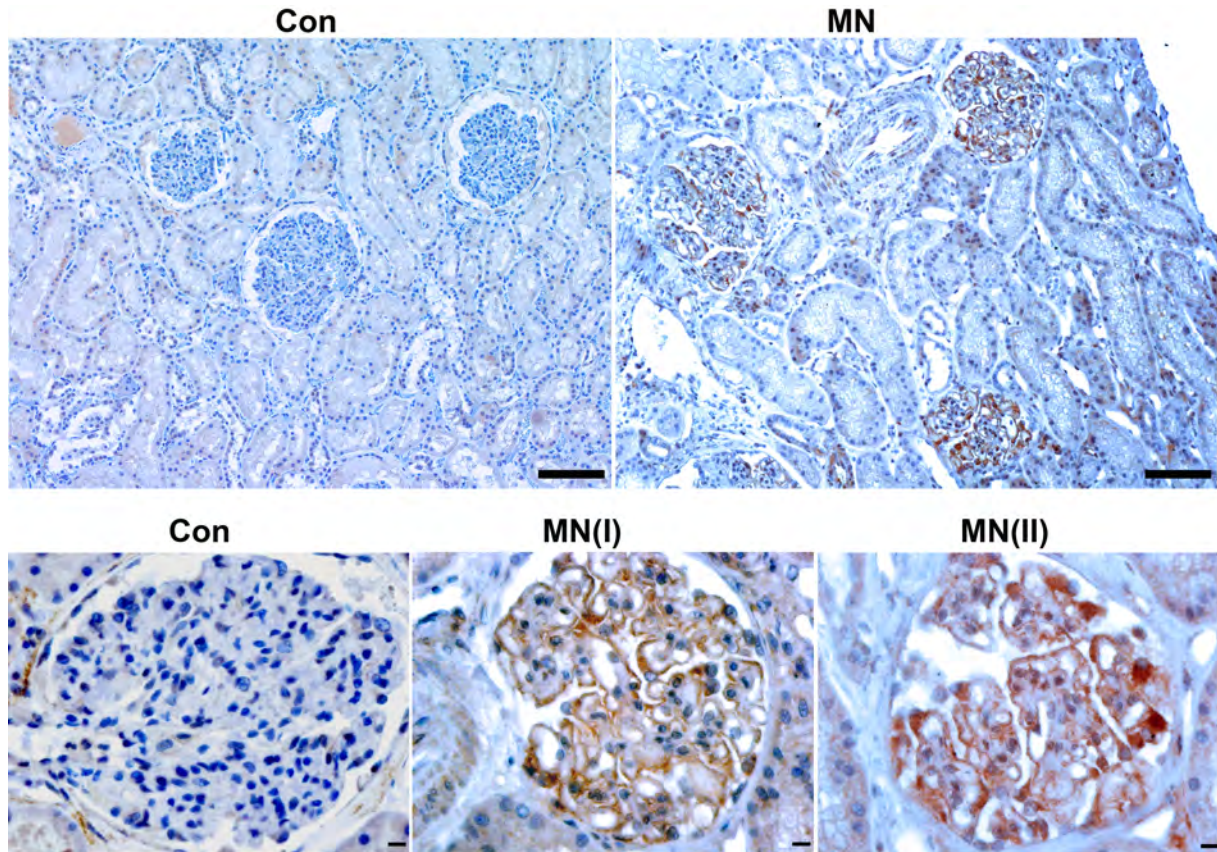

**Figure S1: Representative immunohistochemical analysis of c-mip in serial sections of kidney biopsy specimens from patients with MN and control human kidney (Con). Scale bars, top panel 50  $\mu$ M; lower panel, 20  $\mu$ M**
