# Supplementary material
Source: PubMed Central journal article supplement (PMC3927461)
Supplement: halms815234-supplement_3.pdf [file halms815234-supplement_3.pdf]

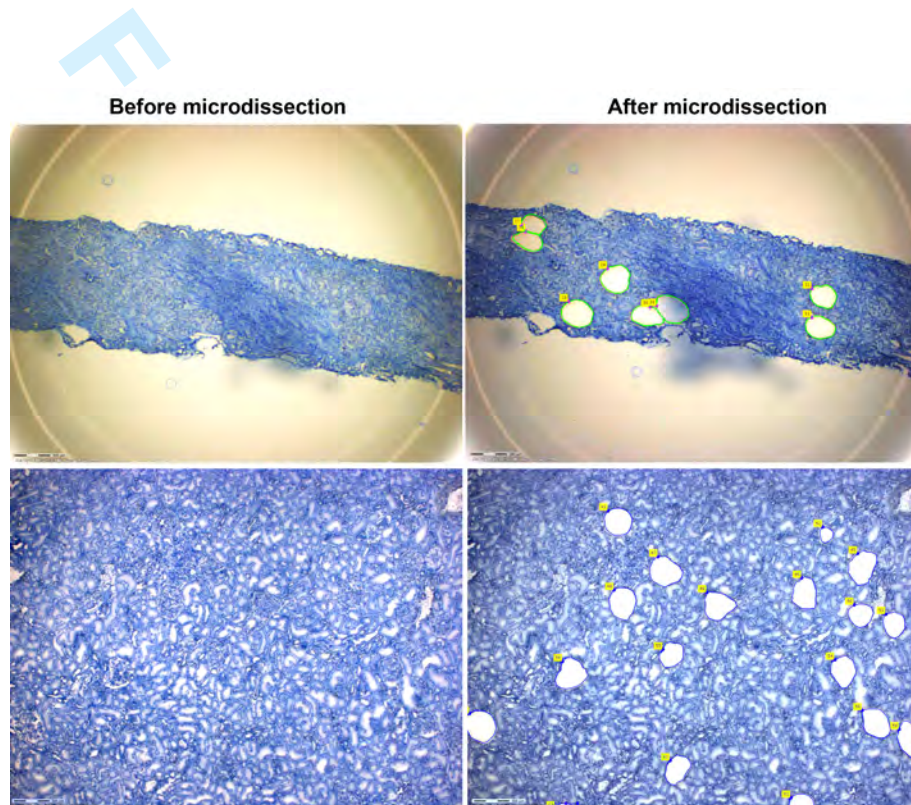

**Figure S3: Micrographs of MN kidney biopsy specimens (top panel) and control human kidney (lower panel), before and after laser microdissection of glomeruli**
